# Supplementary material
Source: publisher figshare collection journal article supplement (https://sage.figshare.com/ndownloader/files/12968363)
Supplement: Supplementary file 1 [file 12968363]

*Figure 1.* Method for identifying the included studies.
